# Supplementary material for: Detecting Pests From Light-Trapping Images Based on Improved YOLOv3 Model and Instance Augmentation
Source: Frontiers journal article supplement (doi:10.3389/fpls.2022.939498), 2022-07-07
Supplement: Data_Sheet_1.PDF [file Data_Sheet_1.PDF]

# Supplementary Material

## 1 SUPPLEMENTARY FIGURES

Precision-Recall graph showing the curves for the methods shown in Table 5. There are nine pest species in total, and the P-R curves for each model occupy two rows, from top to bottom and left to right, with each figure representing (5, 6, 8, 13, 24, 29, 31, 32, 36)

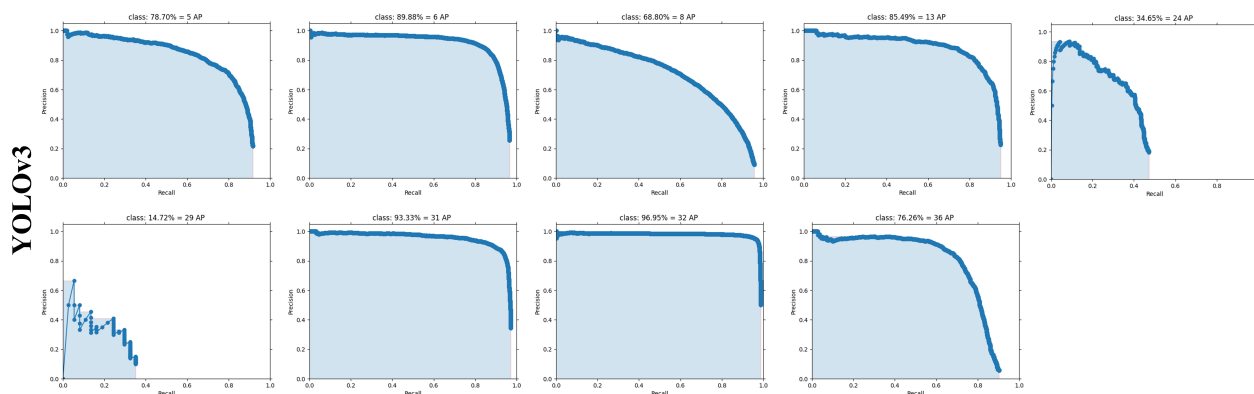

**Figure S1.** Precision-Recall graph showing the curves for **YOLOv3** shown in Table 5.

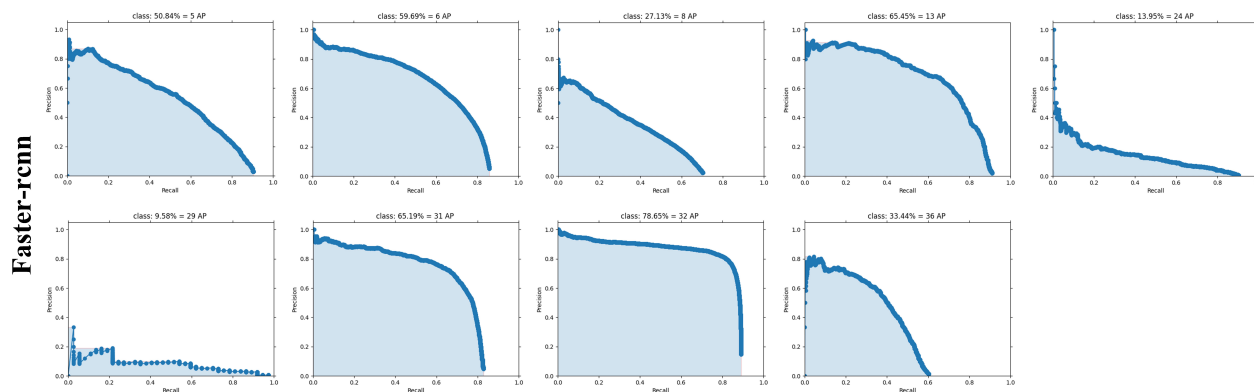

**Figure S2.** Precision-Recall graph showing the curves for **Faster-rcnn** shown in Table 5.

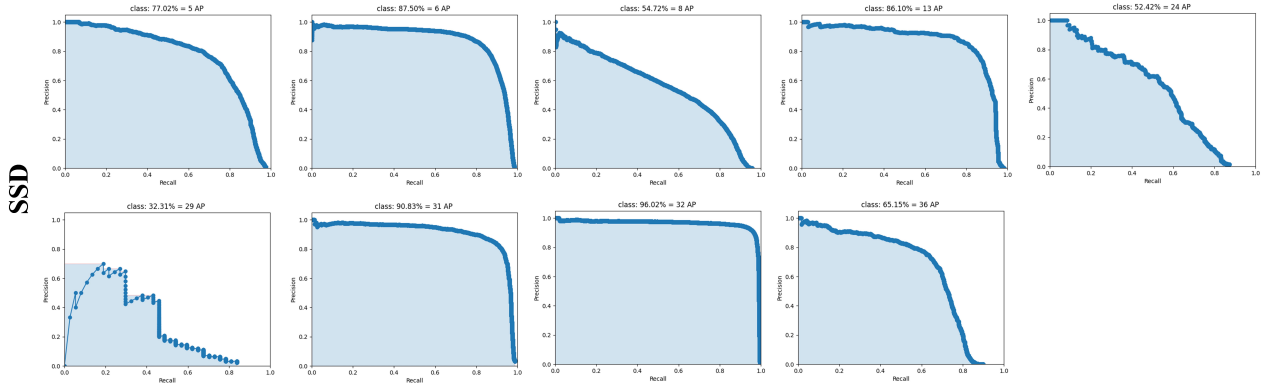

**Figure S3.** Precision-Recall graph showing the curves for **SSD** shown in Table 5.

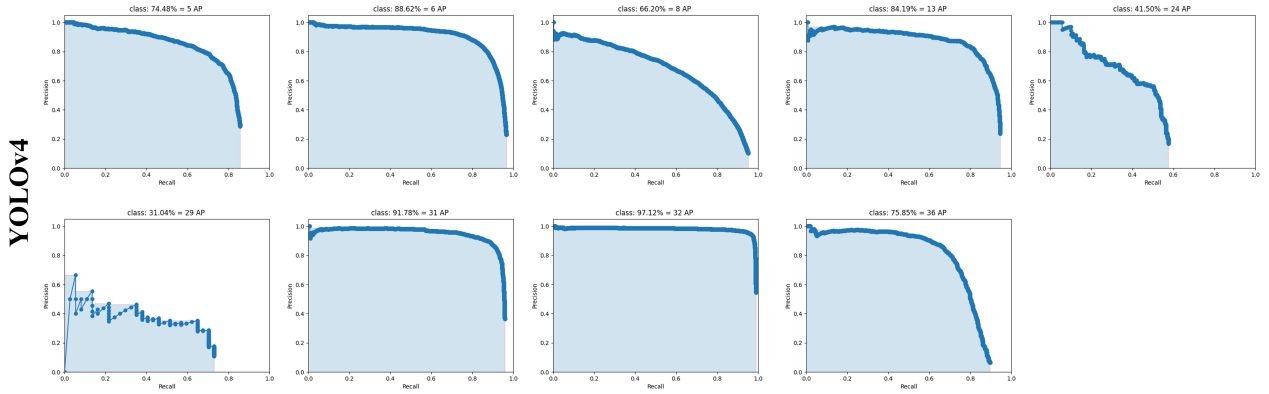

**Figure S4.** Precision-Recall graph showing the curves for **YOLOv4** shown in Table 5.

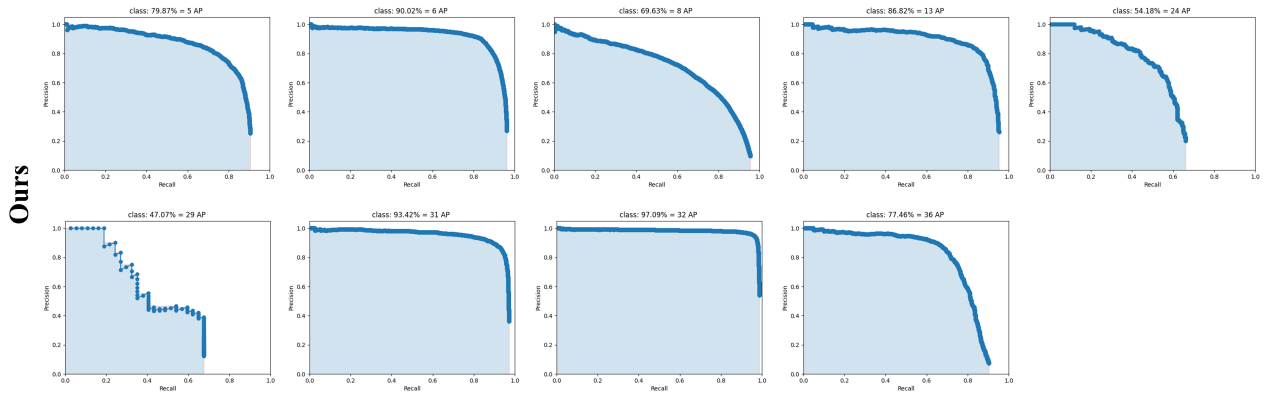

**Figure S5.** Precision-Recall graph showing the curves for **Ours** shown in Table 5.
